# Supplementary material for: Spinifex nanocellulose derived hard carbon anodes for high-performance sodium-ion batteries
Source: Royal Society of Chemistry journal article supplement (doi:10.1039/c7se00169j), 2017-01-01
Supplement: c7se00169j1.pdf [file c7se00169j1.pdf]

## **Electronic Supplementary Information for:**

### **Spinifex Nanocellulose Derived Hard Carbon Anodes for High-Performance Sodium-Ion Batteries**

Rohit Ranganathan Gaddam,<sup>a†</sup> Edward Jiang,<sup>b†</sup> Nasim Amiralian,<sup>b</sup> Pratheep K. Annamalai,<sup>b\*</sup>  
Darren J. Martin,<sup>a,b</sup> Nanjundan Ashok Kumar<sup>a\*</sup> and X. S. Zhao<sup>a</sup>

<sup>a</sup>School of Chemical Engineering,  
The University of Queensland, St Lucia, Brisbane 4072 Australia.

<sup>b</sup>Australian Institute for Bioengineering and Nanotechnology,  
The University of Queensland, St. Lucia, Brisbane 4072, Australia.

<sup>†</sup> These authors contributed equally to this work.

\*Corresponding authors E-mail: [p.annamalai@uq.edu.au](mailto:p.annamalai@uq.edu.au); [ashok.nanjundan@uq.edu.au](mailto:ashok.nanjundan@uq.edu.au)

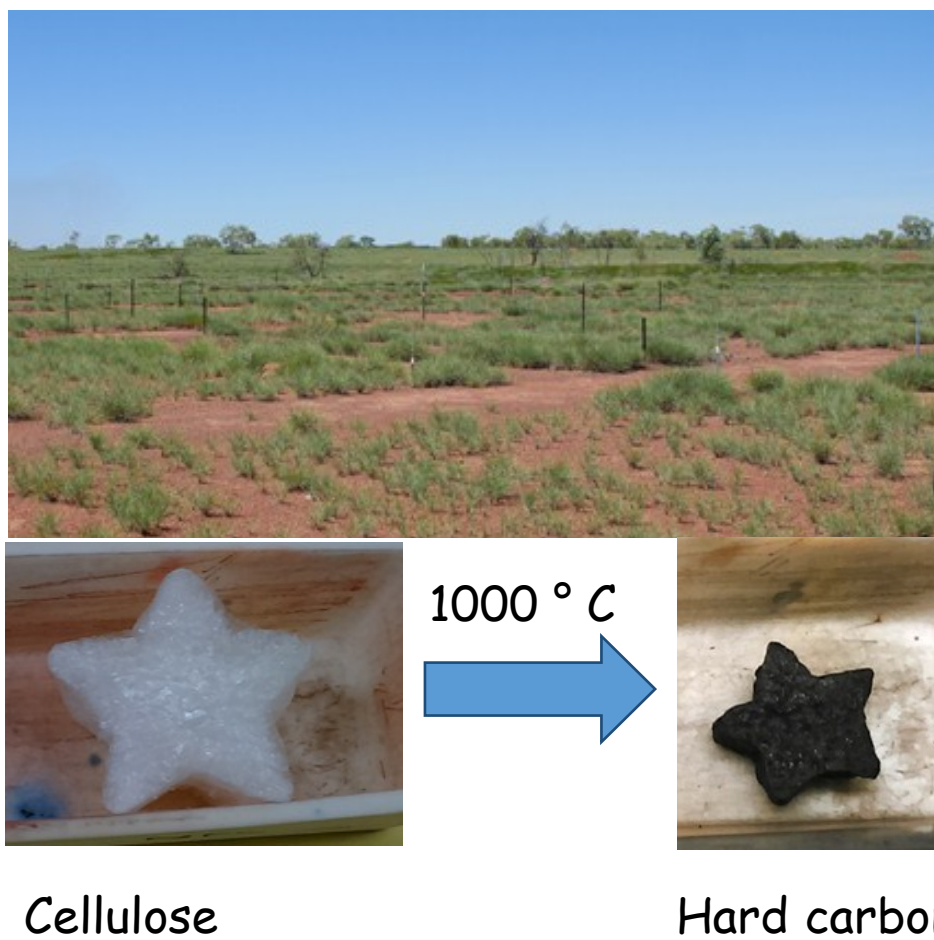

**Figure S1.** Picture of spinifex grass (top) hummocks growing in the grassland in Camooweal, Queensland, Australia (19.9° S, 138.1° E). Cellulose and hard carbon structures obtained after processing (below).

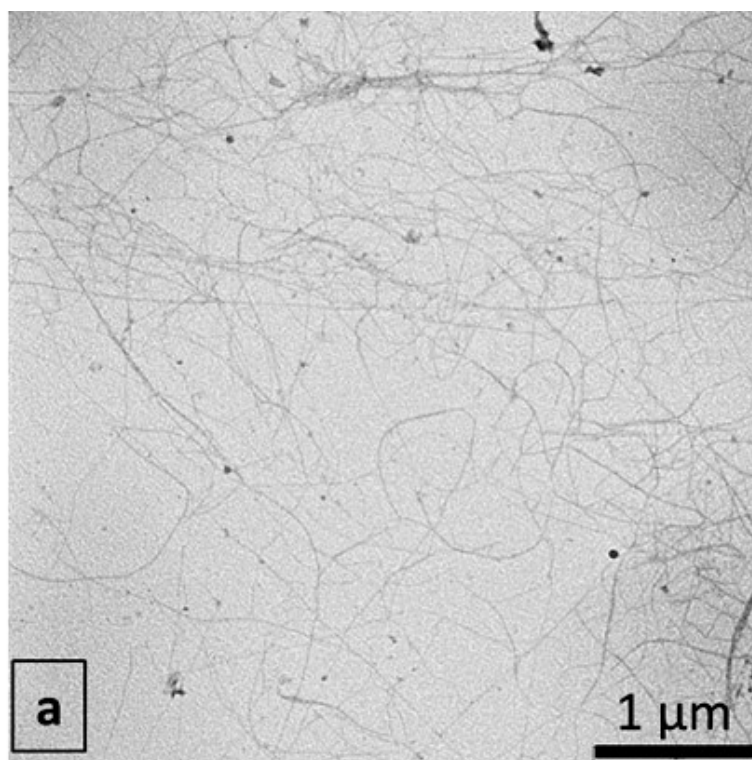

**Figure S2.** TEM images of suspension of bleached spinifex grass derived cellulose nanofibers.

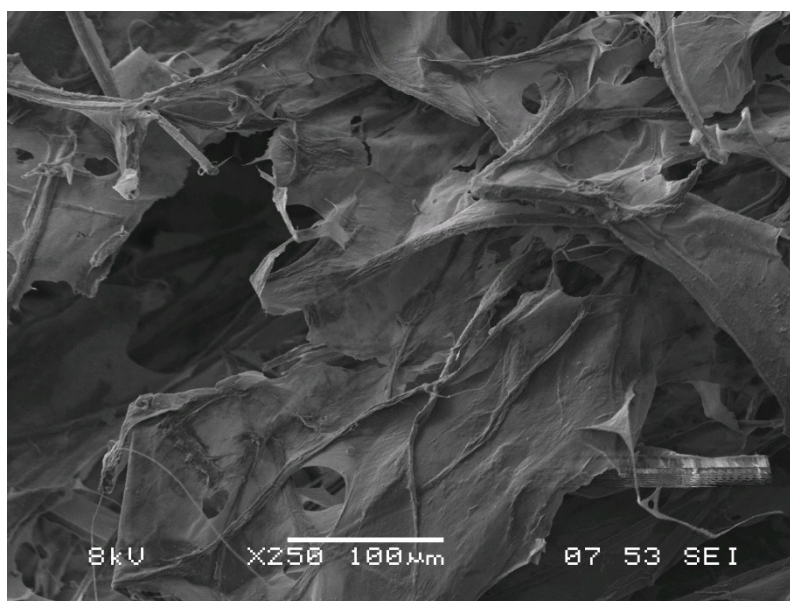

**Figure S3.** FESEM images of spinifex grass derived nanocellulose sheets after freeze-drying.

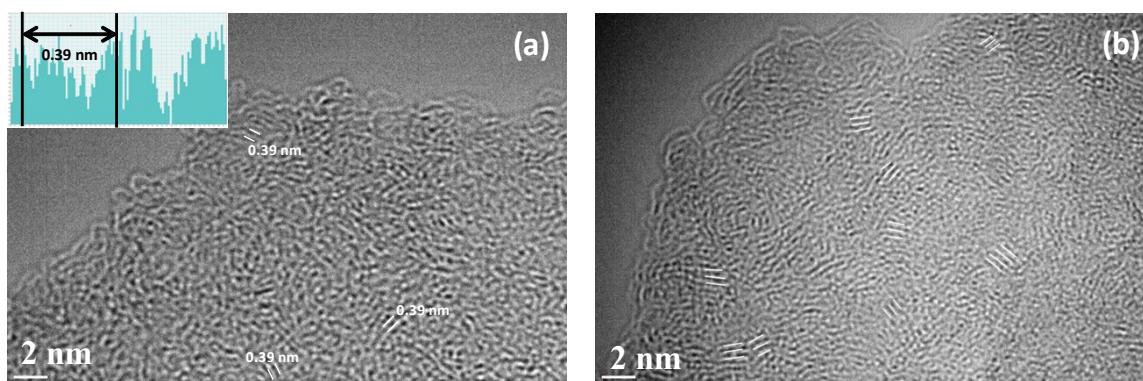

**Figure S4.** High-resolution TEM (inset: interlayer d-spacing of graphite (002) plane).

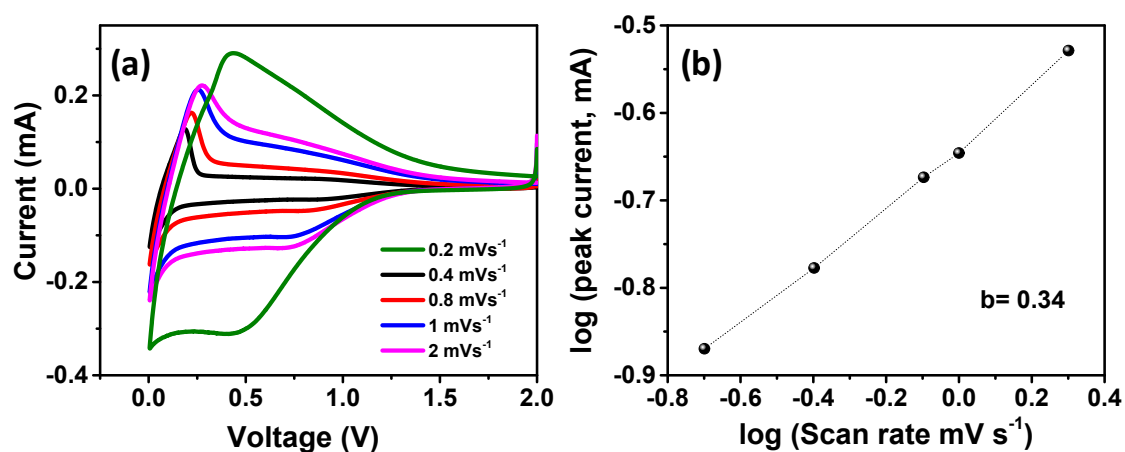

**Figure S5.** Kinetic analysis of NDC electrode tested against sodium: (a) CV curves at different scan rates and (b) log (scan rate)-log (peak current) profiles.

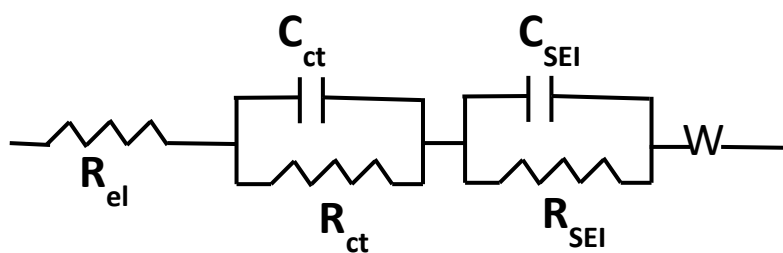

**Figure S6.** Equivalent circuits used to simulate the electrochemical impedance spectra results.

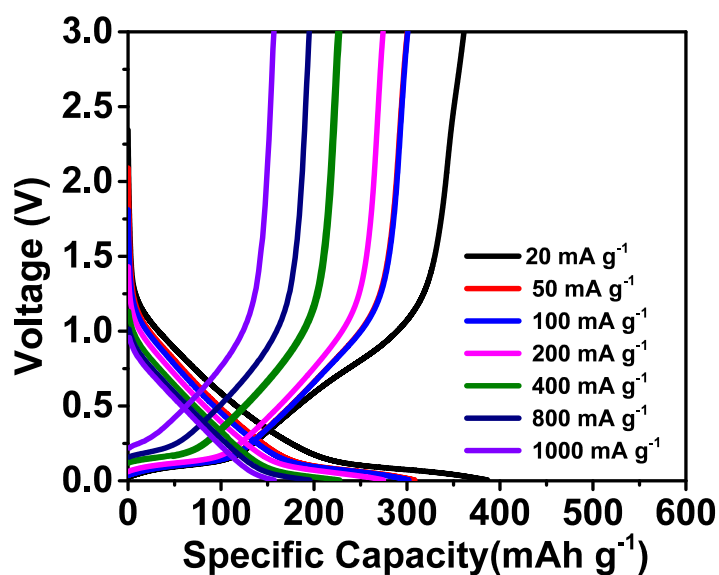

**Figure S7.** Charge-discharge curves at different rates for NDCs tested against sodium.
